# Supplementary material for: Driving a planar model system into the 3rddimension: generation and control of curved pore-spanning membrane arrays
Source: Royal Society of Chemistry journal article supplement (doi:10.1039/c4sm00702f), 2014-06-27
Supplement: c4sm00702f1.pdf [file c4sm00702f1.pdf]

ARTICLE

Supporting Information

Driving a Planar Model System into the 3<sup>rd</sup>  
Dimension: Generation and Control of Curved Pore-  
Spanning Membrane Arrays

www.rsc.org/

Martin Gleisner†, Ingo Mey†, Mariam Barbot<sup>¶</sup>, Christina Dreker<sup>¶</sup>, Michael  
Meinecke<sup>¶‡</sup>, Claudia Steinem\*†

**Fig. S1** depicts a representative scanning electron microscope (SEM) image (top view) of a porous substrate used for the experiments. SEM measurements were performed with a LEO Gemini 1530 SEM with acceleration voltages between 1 and 6 kV.

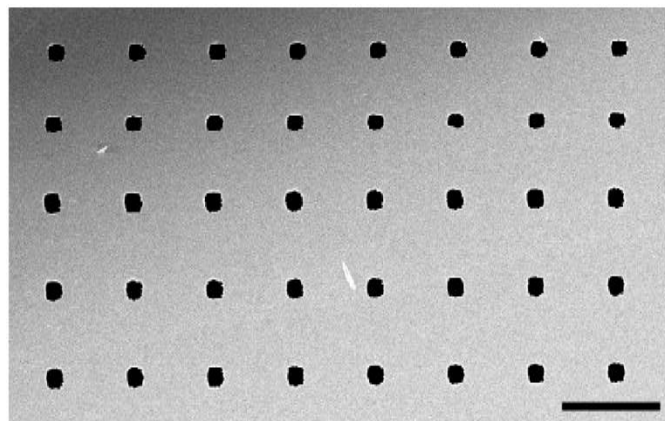

**Fig. S1.** Scanning electron microscopy image of a porous substrate with an interpore distance of 4  $\mu\text{m}$  and a pore diameter of 850 nm. Scale bar: 5  $\mu\text{m}$ .

**Fig. S2** displays fluorescence images of Texas Red DHPE (A) labelled pore-spanning membranes (DPhPC/PIP<sub>2</sub> 99:1) after the addition of Alexa488-labelled ENTH domain (B). The membranes were imaged 40 min after ENTH domain addition. The overlay of both fluorescence images (C) show the co-localization of both fluorophores indicating a homogeneous binding of ENTH domain to the membranes.

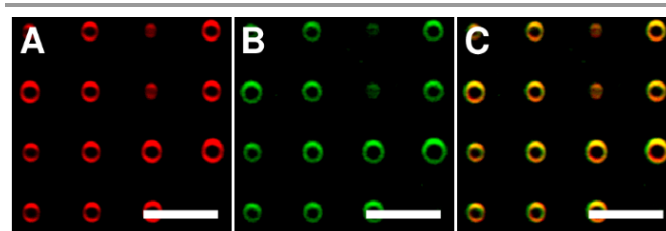

**Fig. S2.** Confocal laser scanning fluorescence microscopy image of **A.** Texas Red DHPE labelled protruded pore-spanning DPhPC/PIP<sub>2</sub> (99:1) membranes after applying an osmolarity gradient of 19 mOsmol/L, and **B.** Alexa488-labelled ENTH domain ( $c = 3 \mu\text{M}$ ) bound to the membranes. **C.** Overlay of the fluorescence images of **A.** and **B.** Scale bars: 5  $\mu\text{m}$ .

**Fig. S3** shows individual time traces of the relative radius  $r/r_0$  of pore-spanning DPhPC/PIP<sub>2</sub> (99:1,  $\mu\text{m}$ ,  $n_0 = 73$ ) to show the deviation within an experiment.

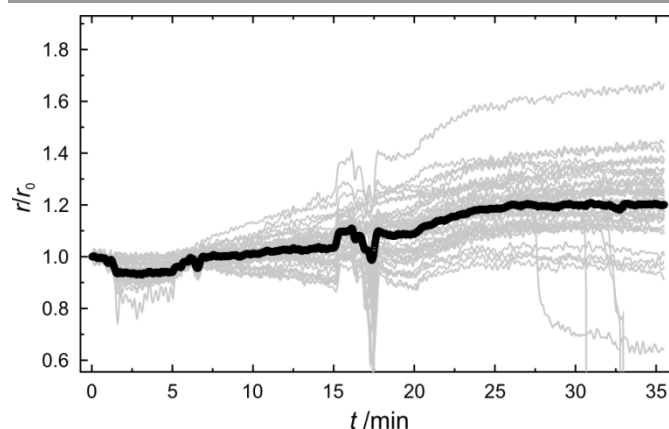

**Fig. S3.** Change of the radius of individual protruded pore spanning membranes composed of DPhPC/PIP<sub>2</sub> (99:1) as a function of time (gray solid lines) after the addition of 3  $\mu\text{M}$  ENTH domain ( $t = 0 \text{ min}$ ). The osmolarity gradient was set to 19 mOsmol/L. The thick black line is the average curve calculated from the  $n_0 = 73$  individual curves.

**Fig. S4** illustrates the calculated change in height  $h$  of the protrusions as a function of the lateral membrane tension  $\sigma$  as obtained from eq. (5) and (6) for an osmolarity gradient of  $\Delta O = 19$  mOsmol/L.

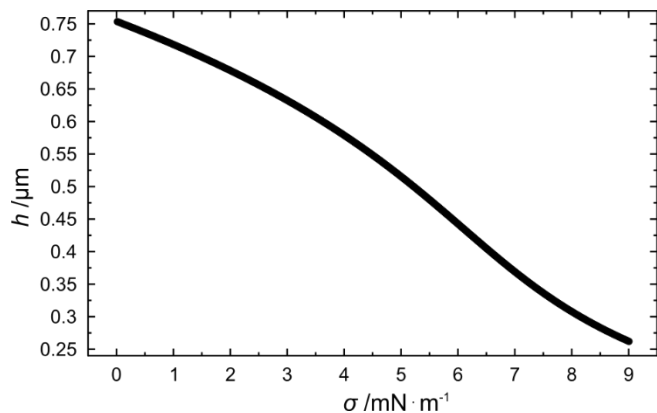

**Fig. S4.** Calculated height  $h$  of the protrusions as a function of lateral membrane tension  $\sigma$  for a given fixed osmolarity gradient of 19 mOsmol/L.

**Movie S1** shows a time series of three dimensional confocal fluorescence  $z$ -stack images of pore-spanning membranes (DPhPC/PIP<sub>2</sub> 99:1, labelled with Texas Red DHPE after applying an osmolarity gradient of 19 mOsmol/L). Data were acquired with a spinning disk confocal fluorescence microscope and the images were rendered using the program IMARIS. ENTH domain (3  $\mu\text{M}$ ) was added at  $t = 0$  s. Shrinking as well as growing of pore-spanning membranes is visible.
